# Supplementary material
Source: PubMed Central journal article supplement (PMC6086583)
Supplement: NIHMS977972-supplement-Supplemental_Material.pdf [file NIHMS977972-supplement-Supplemental_Material.pdf]

## Supplementary Online Content

Graboyes EM, Gross J, Kallogjeri D, et al. Association of compliance with process-related quality metrics and improved survival in oral cavity squamous cell carcinoma. *JAMA Otolaryngol Head Neck Surg*. Published online February 11, 2016. doi:10.1001/10.1001/jamaoto.2015.3595.

**eTable.** Patient and Treatment Characteristics

**eFigure.** Compliance With Quality Metrics

This supplementary material has been provided by the authors to give readers additional information about their work

**eTable. Patient and Treatment Characteristics**

| <b>Patient Variable</b> | <b>Number</b> | <b>(%)</b> |
|-------------------------|---------------|------------|
| Age (years)             |               |            |
| Median (range)          | 60            | 23-92      |
| Gender                  |               |            |
| Male                    | 109           | 57         |
| Female                  | 83            | 43         |
| Current Tobacco Abuse   |               |            |
| Yes                     | 66            | 34         |
| No                      | 126           | 66         |
| Oral Cavity Subsite     |               |            |
| Oral Tongue             | 96            | 50         |
| Floor of Mouth          | 42            | 22         |
| Alveolar Ridge          | 26            | 14         |
| Retromolar Trigone      | 15            | 8          |
| Hard Palate             | 9             | 5          |
| Buccal                  | 4             | 2          |
| ACE-27 Comorbidity      |               |            |
| 0-1                     | 132           | 69         |
| 2-3                     | 60            | 31         |
| Clinical T-stage        |               |            |
| Dysplasia/in-situ       | 4             | 2          |
| 1                       | 58            | 30         |
| 2                       | 56            | 29         |
| 3                       | 20            | 10         |
| 4a                      | 54            | 28         |
| Clinical N-stage        |               |            |
| 0                       | 122           | 64         |
| 1                       | 31            | 16         |
| 2a                      | 6             | 3          |
| 2b                      | 14            | 7          |
| 2c                      | 18            | 9          |
| 3                       | 1             | 1          |
| Pathologic T-stage      |               |            |
| 1                       | 86            | 45         |
| 2                       | 42            | 22         |
| 3                       | 14            | 7          |
| 4a                      | 50            | 26         |
| Pathologic N-stage      |               |            |
| 0                       | 126           | 66         |
| 1                       | 25            | 13         |
| 2a                      | 1             | 1          |
| 2b                      | 25            | 13         |
| 2c                      | 13            | 7          |
| 3                       | 2             | 1          |

|                      |     |    |
|----------------------|-----|----|
| Final Margins        |     |    |
| Negative             | 182 | 95 |
| Positive             | 10  | 5  |
| Extracapsular Spread |     |    |
| No                   | 143 | 75 |
| Yes                  | 49  | 25 |
| Adjuvant Therapy     |     |    |
| None                 | 108 | 56 |
| Radiation            | 40  | 21 |
| Chemoradiation       | 44  | 23 |

**eFigure.** Compliance with Quality Metrics

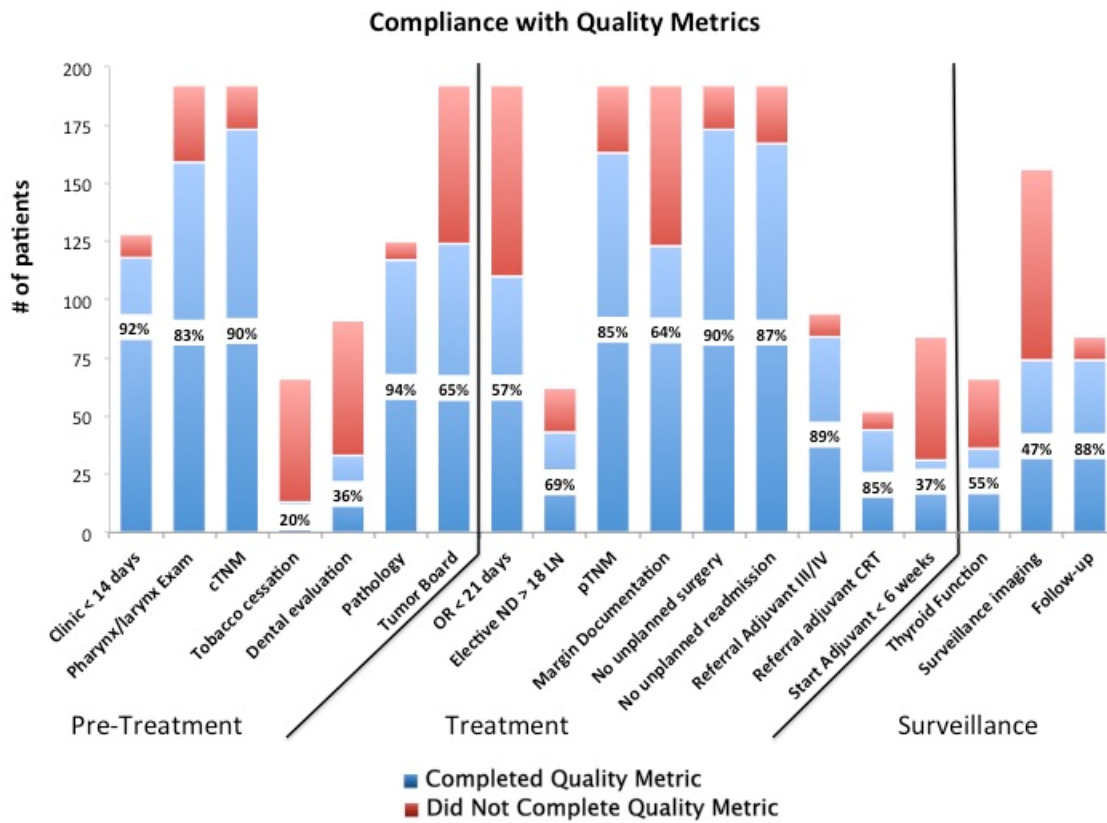

Compliance with the set of 19 quality care metrics with face validity. The height of the total bar is equal to the number of patients eligible for the given metric. The % compliance with the metric is indicated as a number overlying the blue bar.
